# Supplementary material for: A Comparative Study on Insect Longevity: Tropical Moths Do Not Differ From Their Temperate Relatives
Source: Research Square preprint supplement (doi:10.21203/rs.3.rs-685956/v1), 2021-07-13

## Appendix 2.

The phylogenetic tree of 206 Geometridae species (110 from Uganda (red); 96 from Estonia (blue)) for which life span data was obtained. The subfamily Ennominae is marked in gray background.

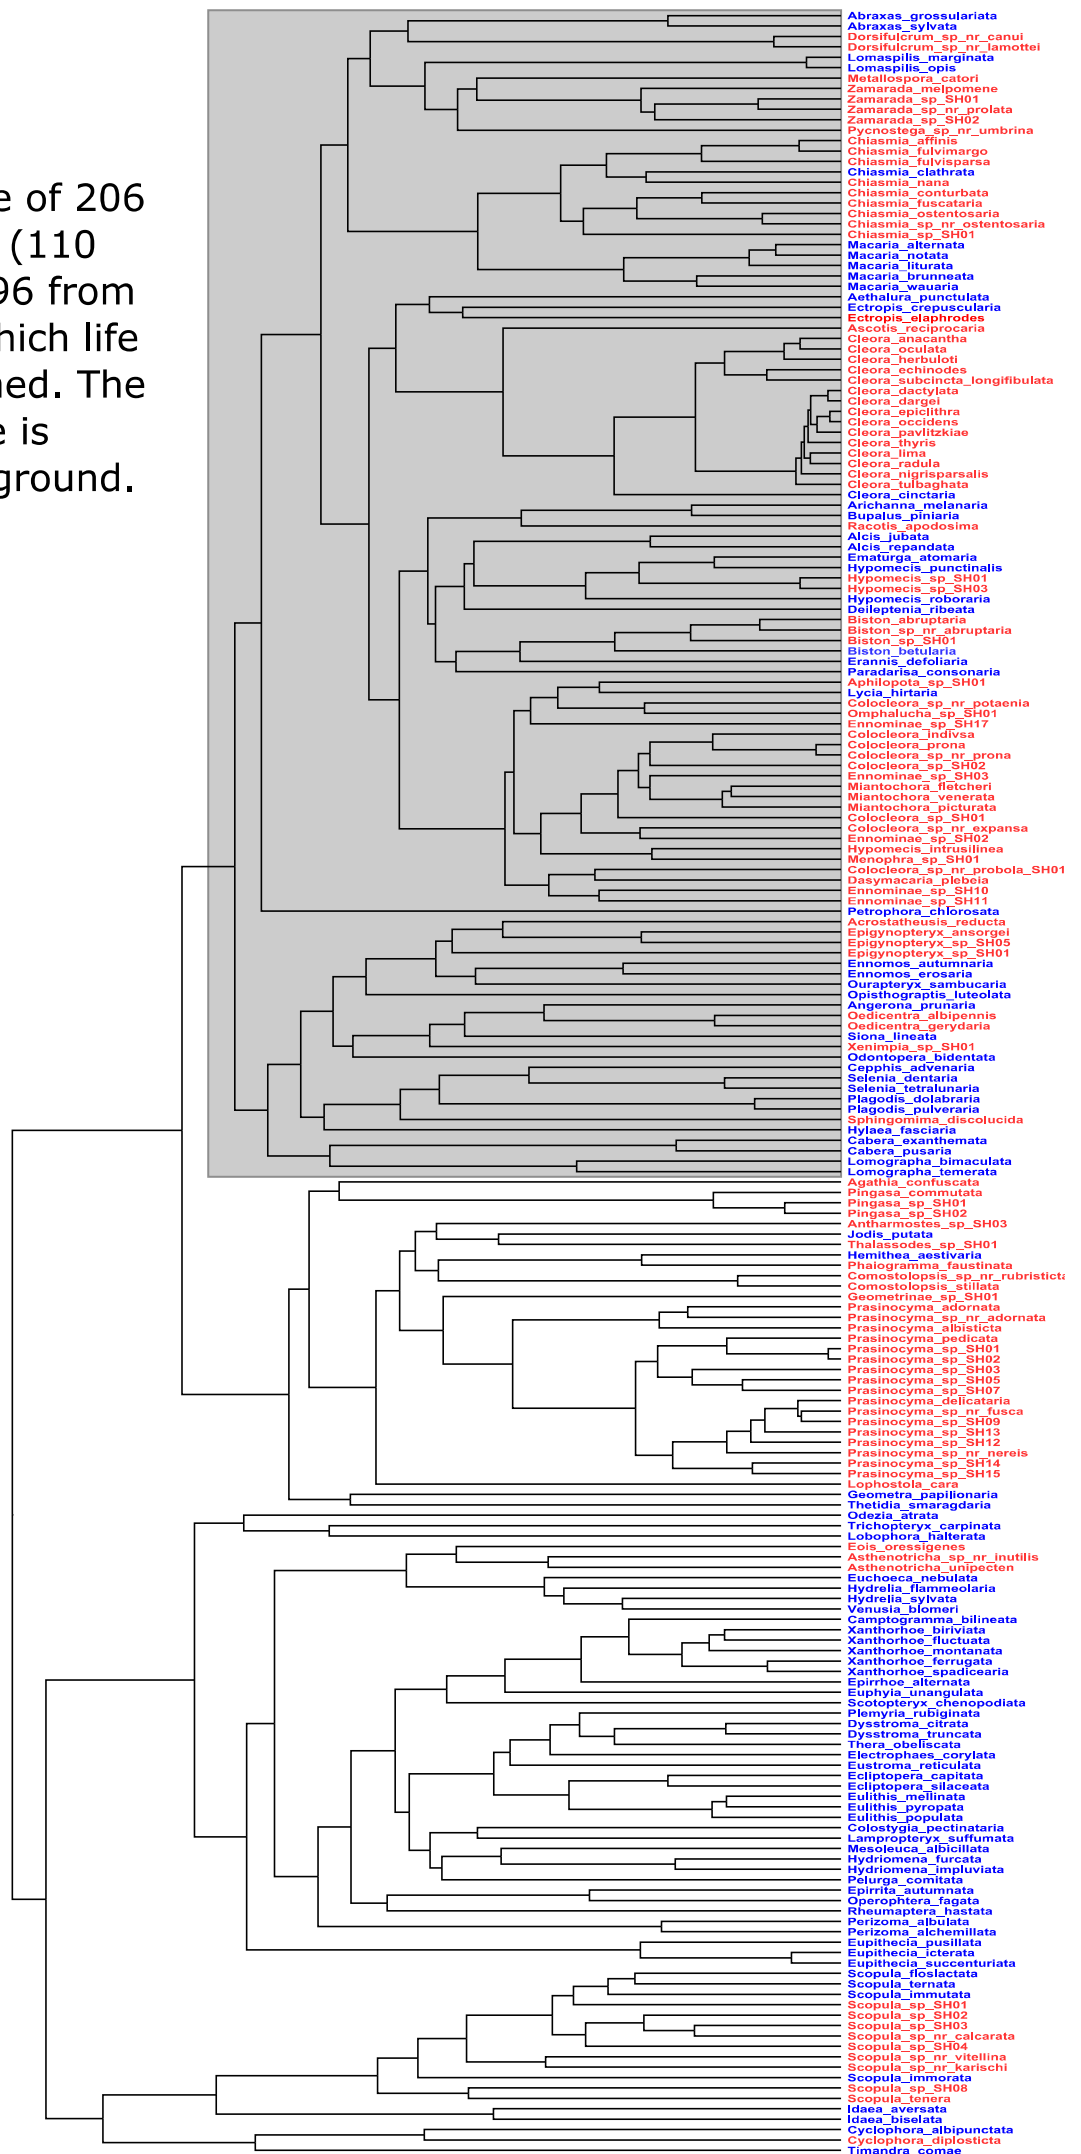

Supplement: Supplementary file 1 [file defcf277fedc08c23c364edf.pdf]
