# Supplementary material for: A Comparative Study on Insect Longevity: Tropical Moths Do Not Differ From Their Temperate Relatives
Source: Research Square preprint supplement (doi:10.21203/rs.3.rs-685956/v1), 2021-07-13
Supplement: Supplementary file 2 [file eb577eb78be8bc346b68c1e7.docx]

**Appendix 1.** Species-specific trait values for the geometrid moth species from Estonia and Uganda.

**Appendix 1**. Continued.

**Appendix 1**. Continued.

**Appendix 1**. Continued.

**Appendix 1.** Continued.
